# Supplementary material for: Development of an intense yellow-coloured BiVO4/ZrO2composite coating for anticorrosion multifunctional cool roofing
Source: Royal Society of Chemistry journal article supplement (doi:10.1039/d3nj01023f), 2023-01-01
Supplement: d3nj01023f1.pdf [file d3nj01023f1.pdf]

## **Supporting Information**

### **Development of intense yellow color BiVO<sub>4</sub>/ZrO<sub>2</sub> composite coating for anticorrosive multifunctional cool roof**

A. H. Riyas,<sup>1</sup> C.V. Geethanjali,<sup>1</sup> Liya Johnson,<sup>1</sup> Liju Elias,<sup>1</sup> A.M.A. Henaish,<sup>2</sup> Aslam Hossain,<sup>3</sup>  
S. M. A. Shibli<sup>1,4\*</sup>

<sup>1</sup>Department of Chemistry, University of Kerala, Karyavattom campus, Thiruvananthapuram,  
Kerala – 695 581, India

<sup>2</sup>NANOTECH Center, Ural Federal University, Ekaterinburg 620002, Russia.

<sup>3</sup>Smart Materials Research Institute, Southern Federal University, Sladkova 178/24, 344090,  
Rostov-on-Don, Russia

<sup>4</sup>Centre for Renewable Energy and Materials, University of Kerala, Kariavattom Campus,  
Thiruvananthapuram, Kerala, 695 581, India

\*Corresponding Author: S.M.A. Shibli Ph: +91 8547067230, E. mail: [smashibli@yahoo.com](mailto:smashibli@yahoo.com)

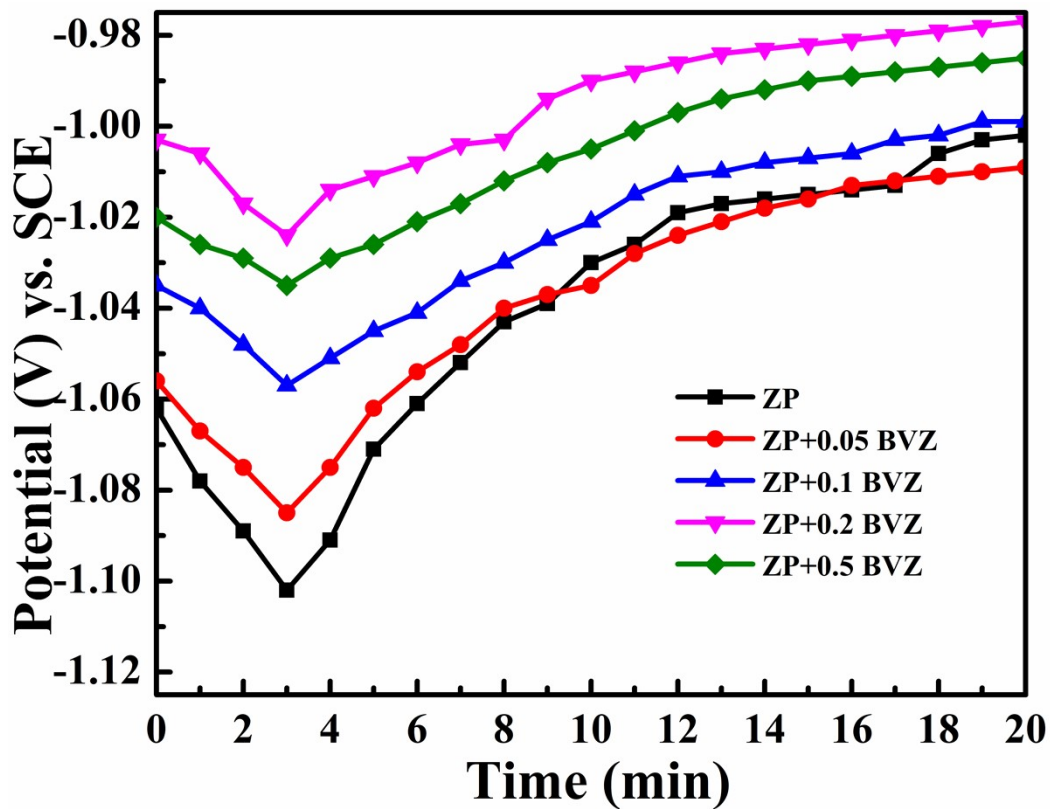

Fig. S1. The trend of potential-time curves obtained during the zinc phosphating process of galvanized steel in the presence and absence of BVZ composites

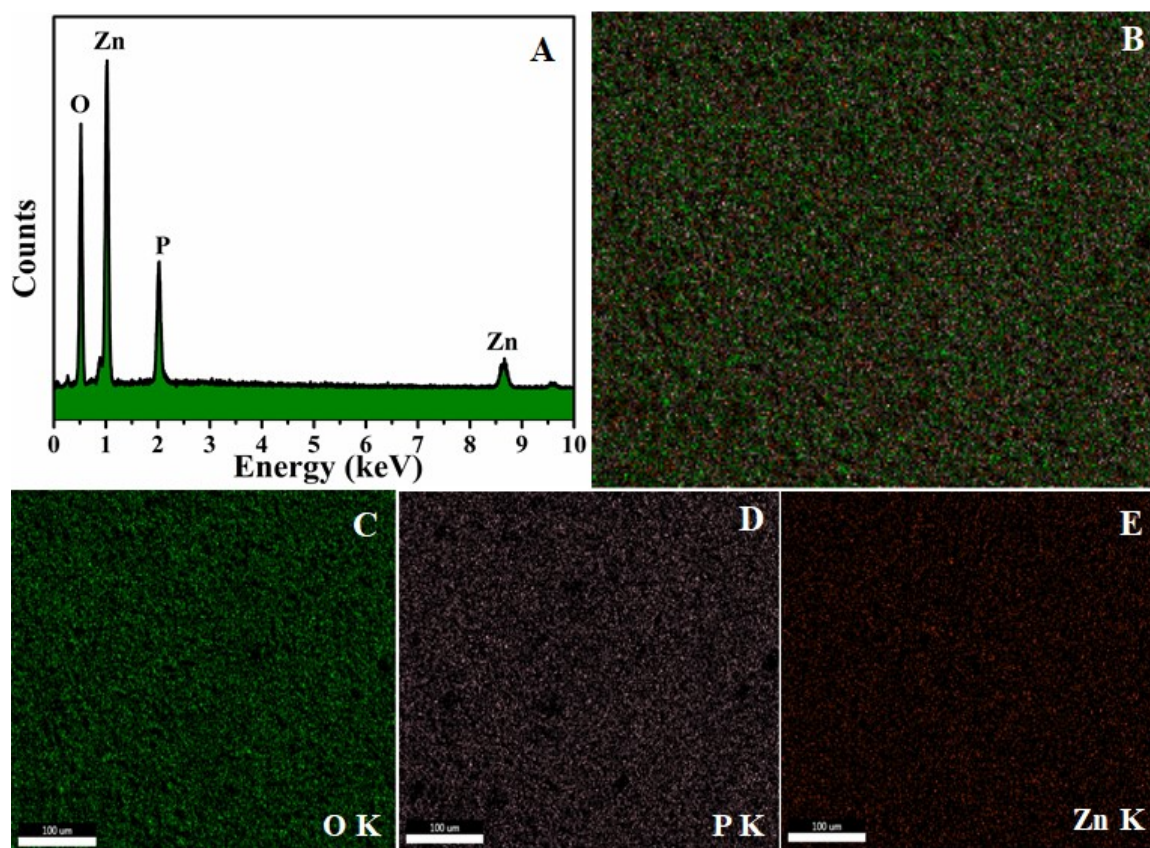

**Fig. S2.** (A) EDS spectrum and EDS elemental mapping spectrum of zinc phosphate coating developed from the bath in the absence of BVZ composite; (B) EDS layered image, (C) O K, (D) P K and (E) Zn K

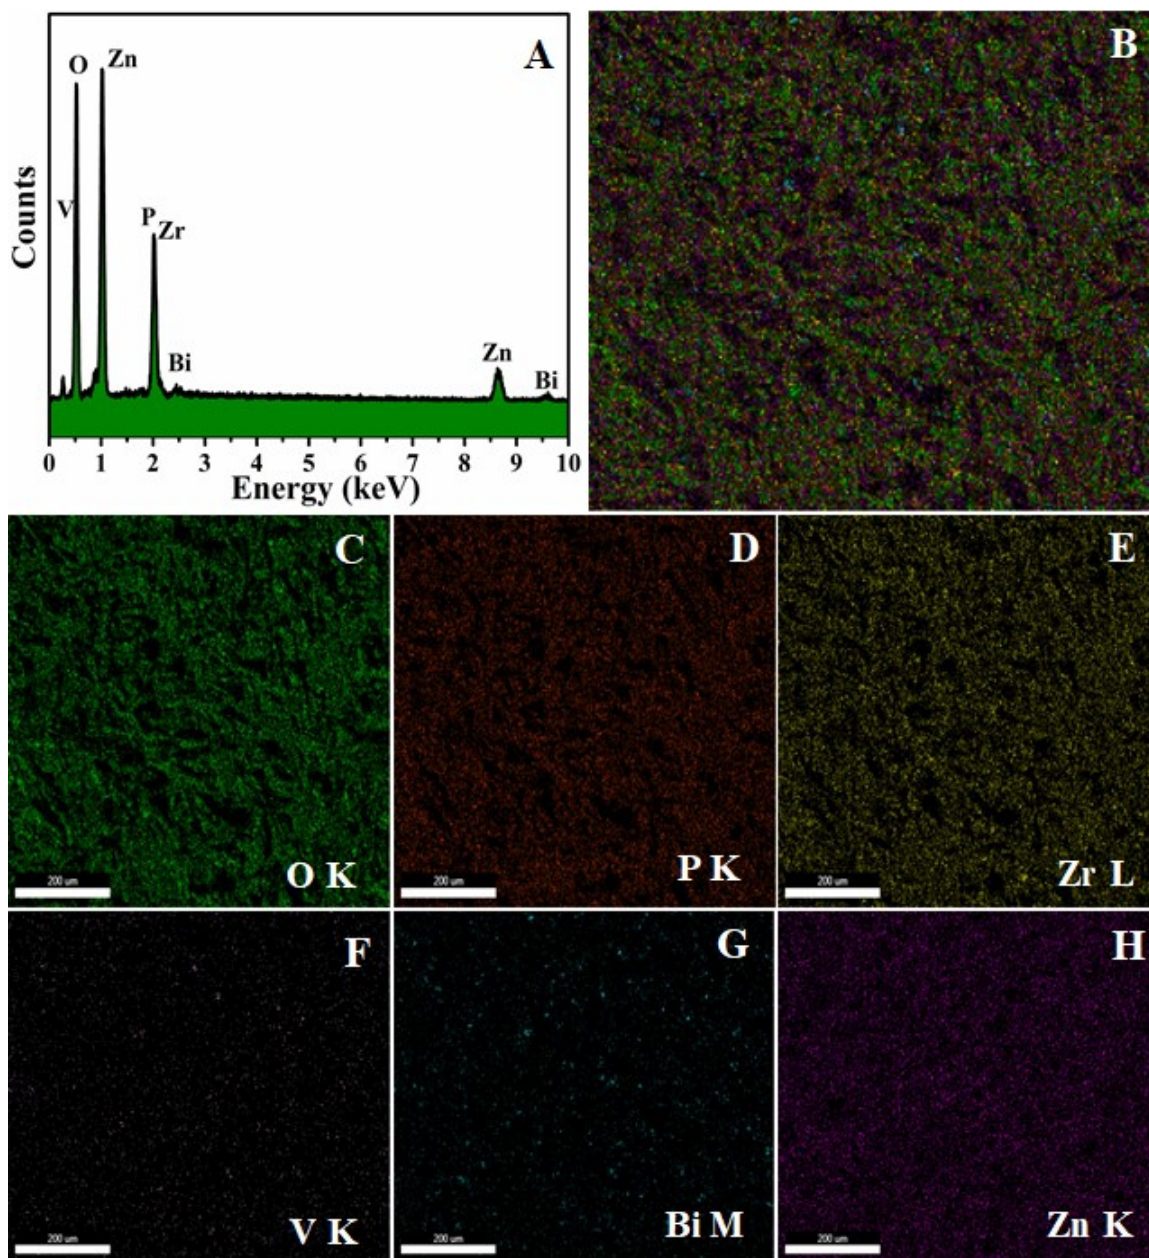

**Fig. S3.** (A) EDS spectrum and EDS elemental mapping spectra of zinc phosphate coating developed from the bath containing 0.05 wt.% of BVZ composite; (B) EDS layered image, (C) O K, (D) P K, (E) Zr L, (F) V K, (G) Bi M and (H) Zn K

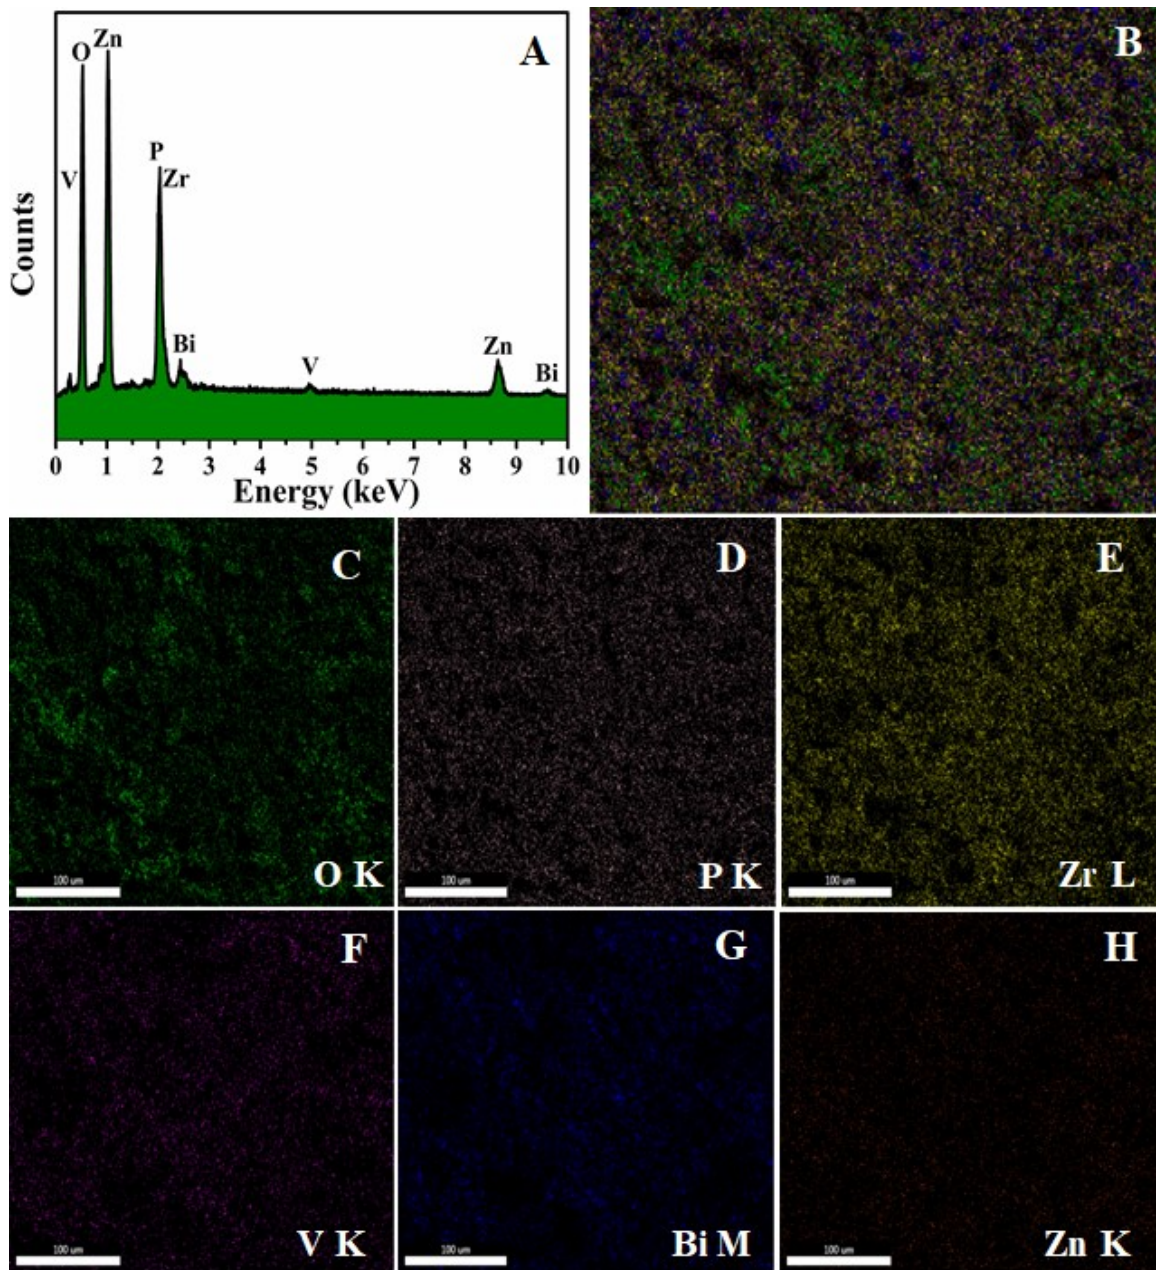

**Fig. S4.** (A) EDS spectrum and EDS elemental mapping spectra of zinc phosphate coating developed from the bath containing 0.1 wt.% of BVZ composite; (B) EDS layered image, (C) O K, (D) P K, (E) Zr L, (F) V K, (G) Bi M and (F) Zn K

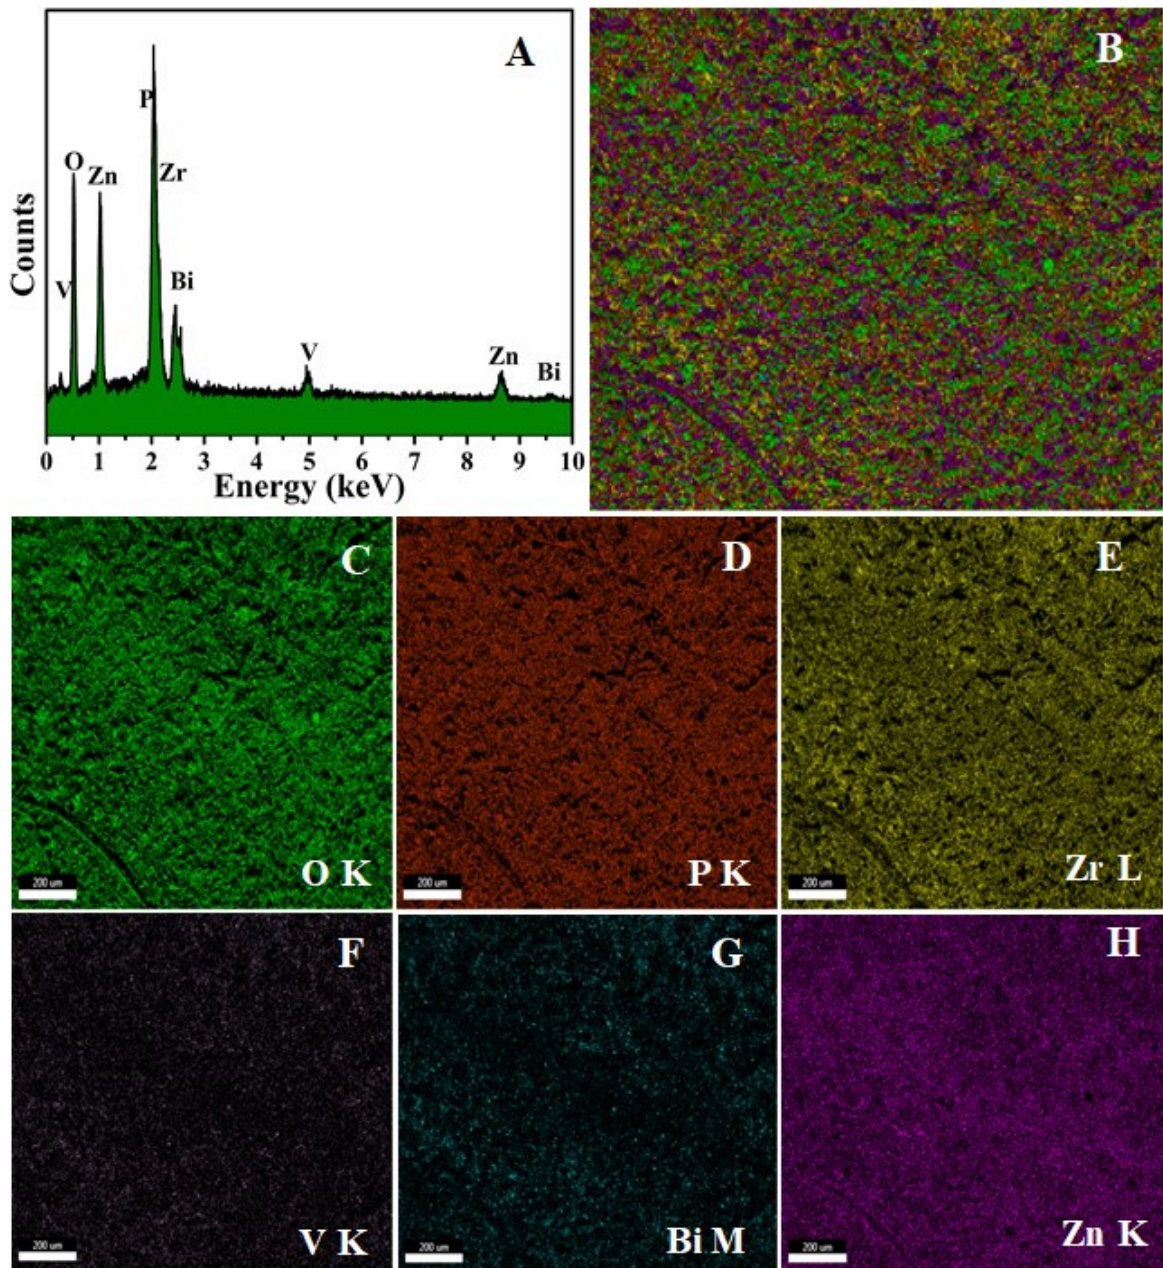

**Fig. S5.** (A) EDS spectrum and EDS elemental mapping spectra of zinc phosphate coating developed from the bath containing 0.2 wt.% of BVZ composite; (B) EDS layered image, (C) O K, (D) P K, (E) Zr L, (F) V K, (G) Bi M and (F) Zn K

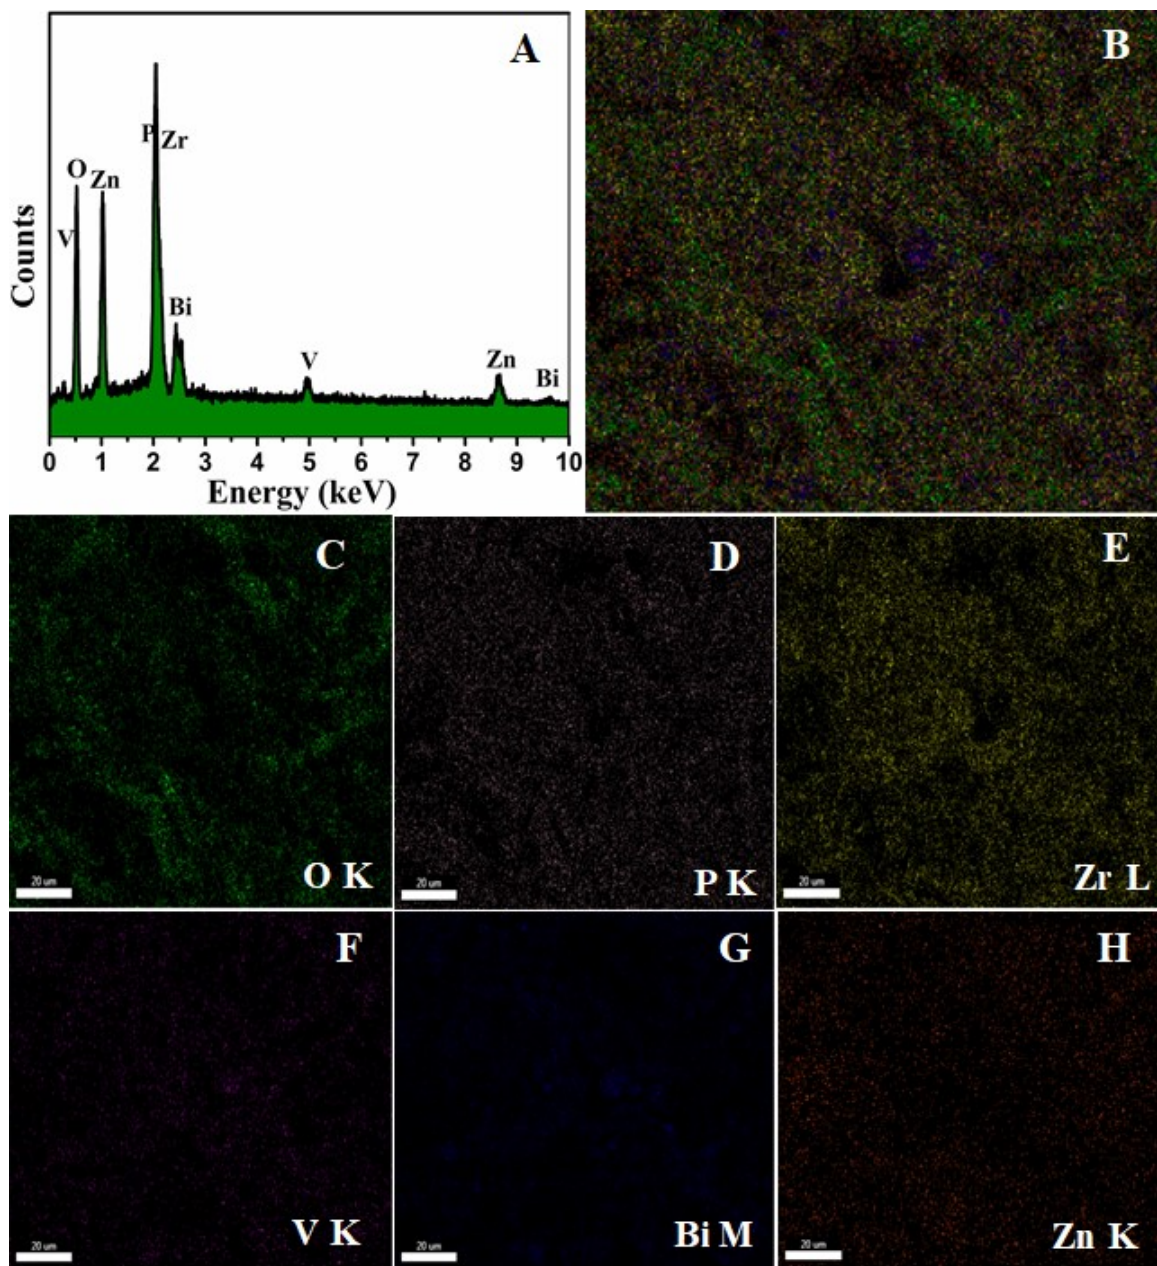

**Fig. S6.** (A) EDS spectrum and EDS elemental mapping spectra of zinc phosphate coating developed from the bath containing 0.5 wt.% of BVZ composite; (B) EDS layered image, (C) O K, (D) P K, (E) Zr L, (F) V K, (G) Bi M and (F) Zn K

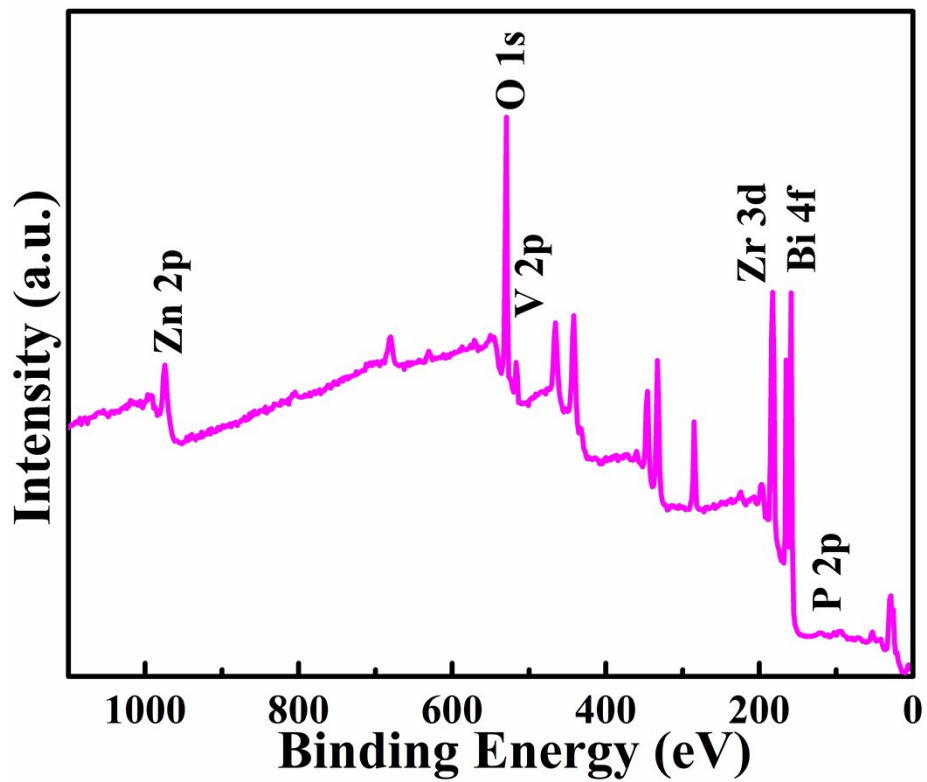

**Fig. S7.** XPS survey spectrum of zinc phosphate coatings developed from the bath containing BVZ composite

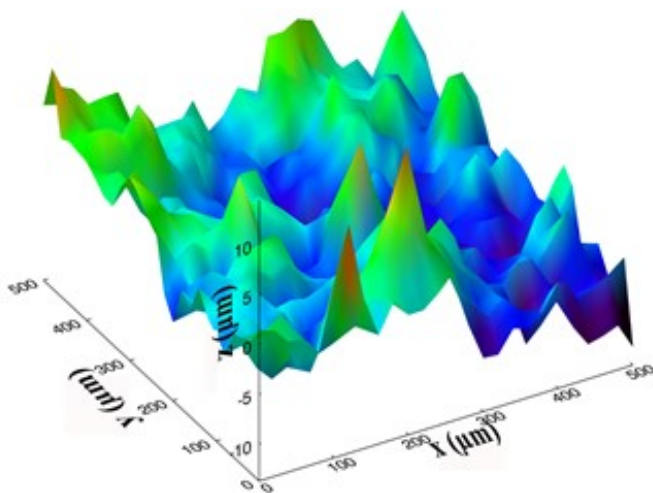

**Fig. S8.** OSP 3D images of bare zinc phosphate coatings



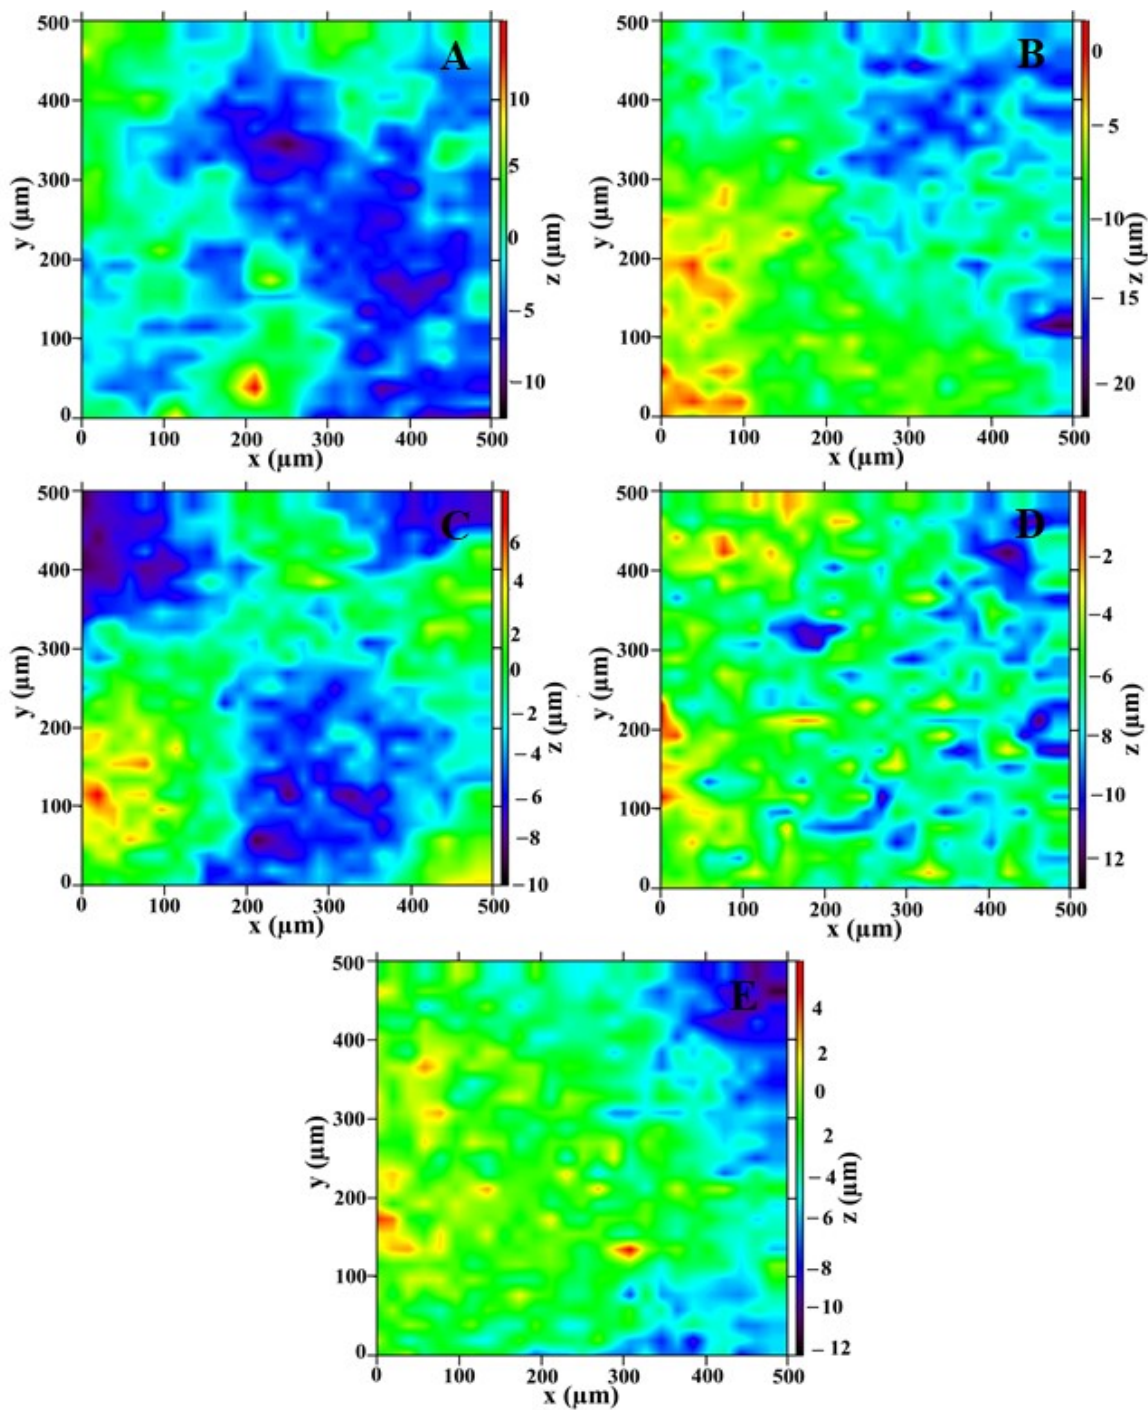

**Fig. S9.** OSP 2D images of zinc phosphate coatings developed from the bath containing different compositions of BVZ composite: (A) 0 wt.%, (B) 0.05 wt.%, (C) 0.1 wt.%, (D) 0.2 wt.% and (E) 0.5 wt.%

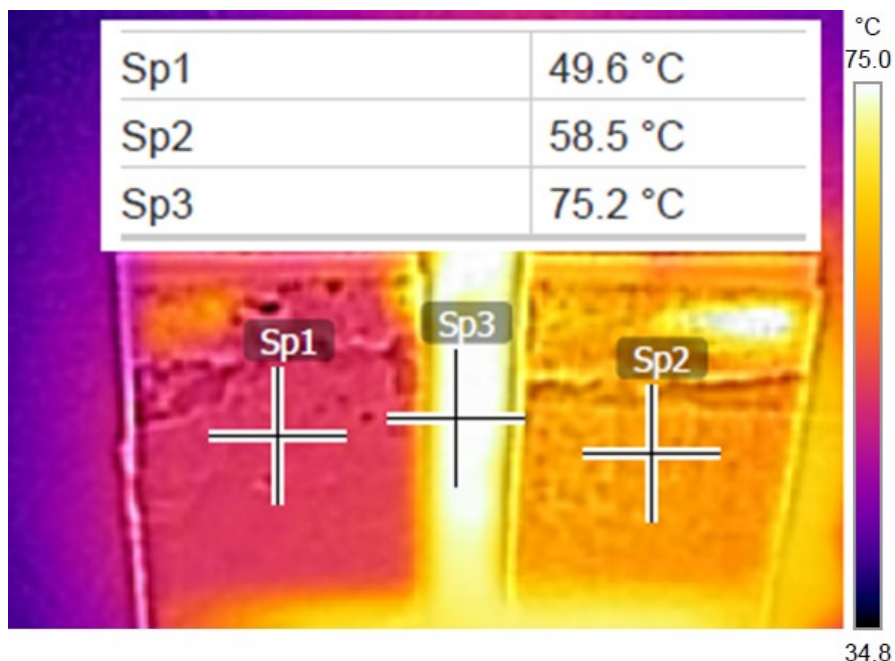

**Fig. S10.** FLIR thermal image of bare zinc phosphate coatings with and without BVZ composite (Sp1 – Temperature of zinc phosphate coating with BVZ composite, Sp2 – Temperature of zinc phosphate coating without BVZ composite, and Sp3 – Temperature of hot plate region)

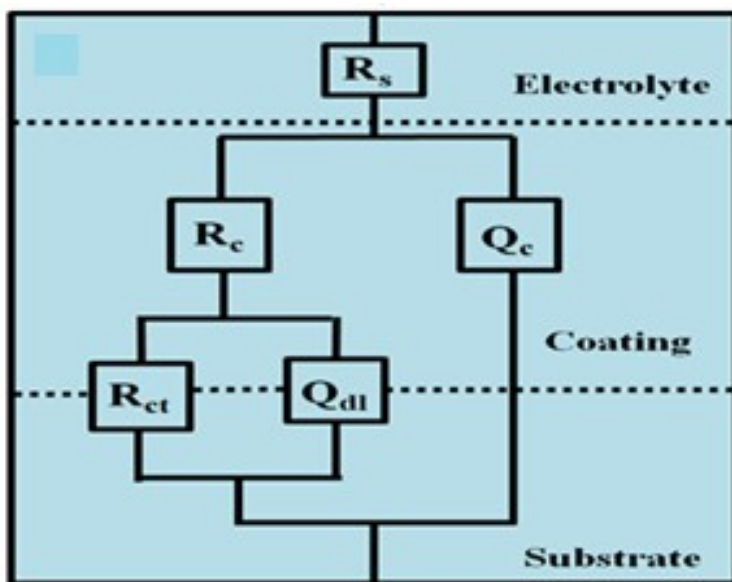

**Fig. S11** equivalent circuit of of BVZ composite zinc phosphate coatings

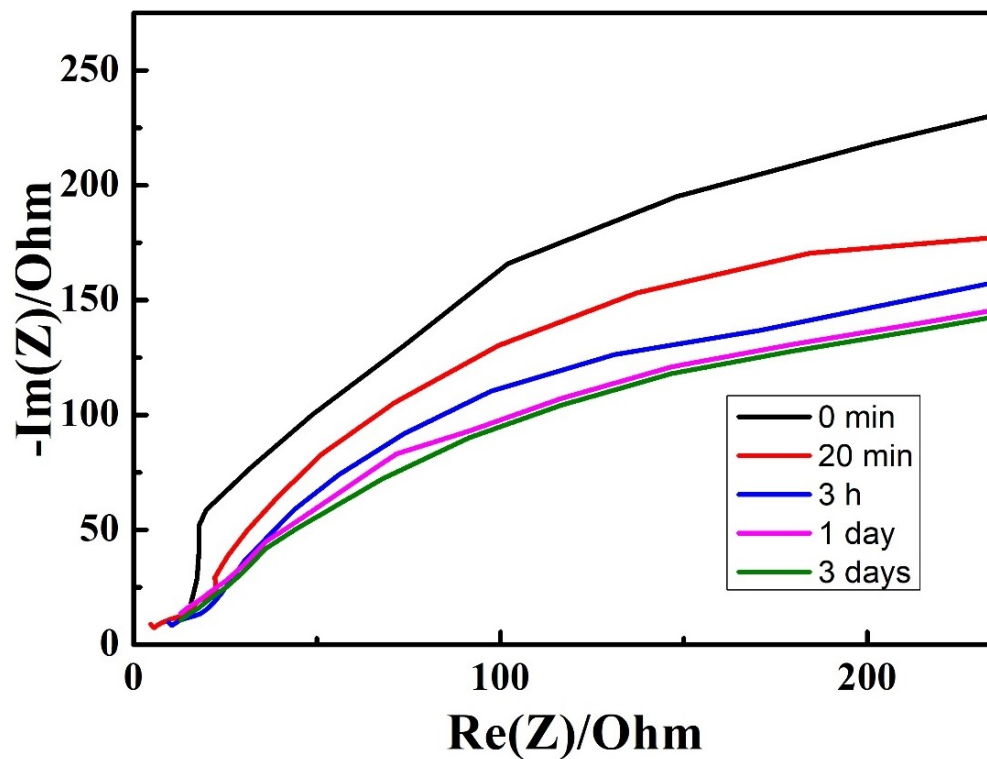

**Fig. S12.** Nyquist plots of 0.2 wt.% BVZ coating after 0 min, 20 min, 3 h, 1 day and 3 days immersion in 3.5 wt.% NaCl solution.

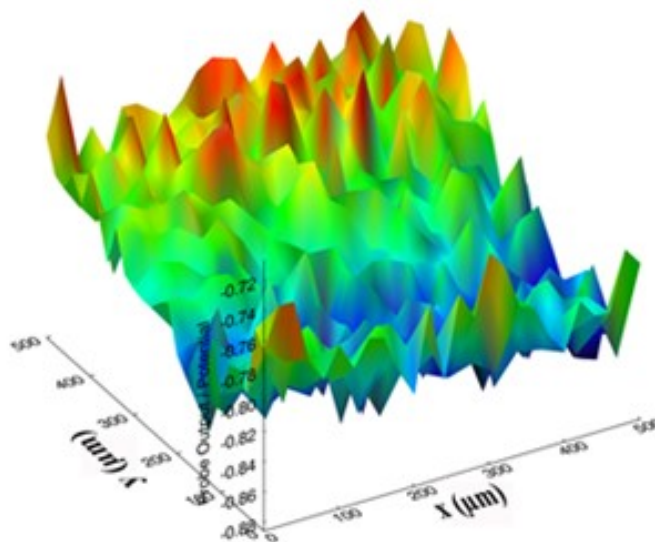

**Fig. S13** 3D SKPM images of (A) 0 wt.%,

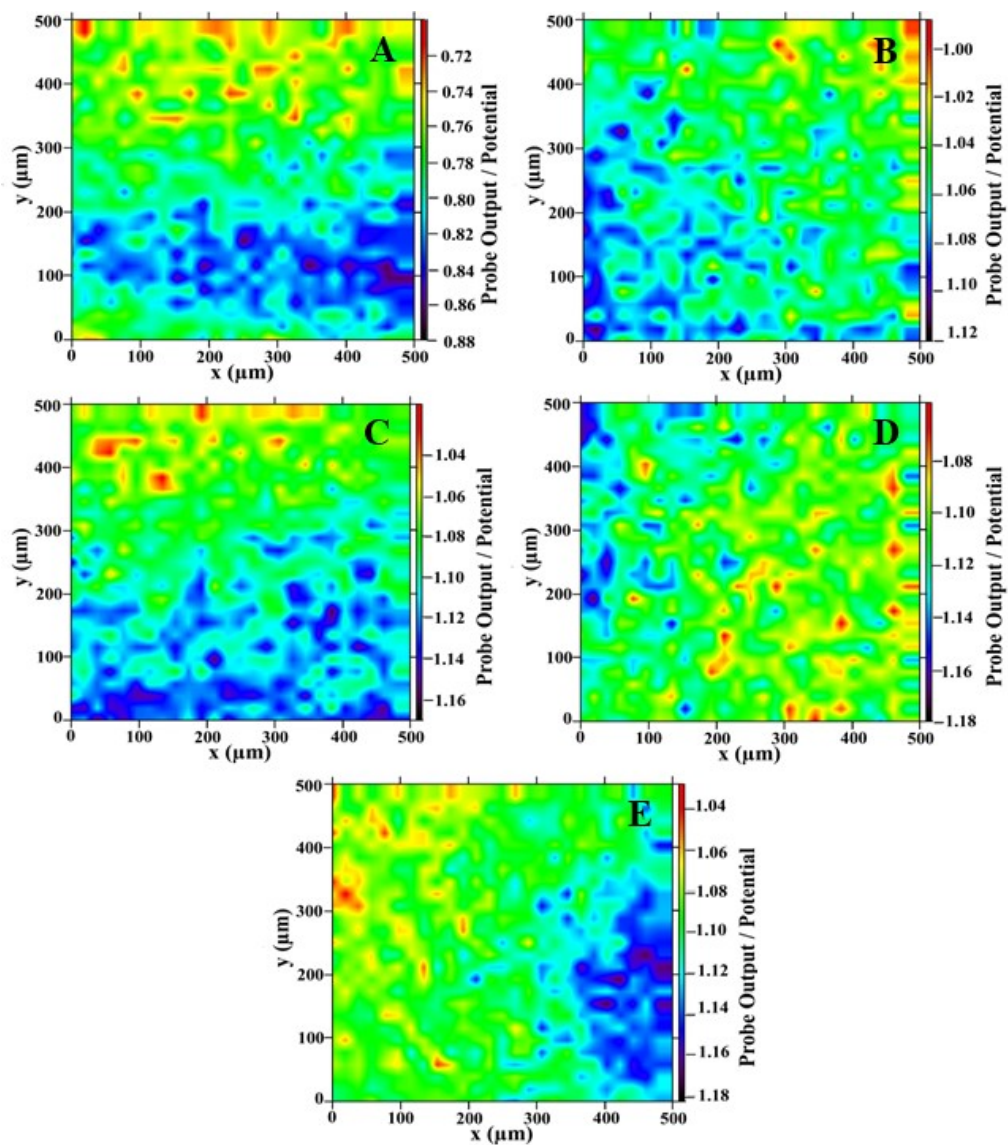

**Fig. S14.** 2D SKPM images of zinc phosphate coating developed from the bath containing different contents of BVZ composite; (A) 0 wt.%, (B) 0.05 wt.%, (C) 0.1 wt.%, (D) 0.2 wt.% and (E) 0.5 wt.%

**Table S1.** Phosphating bath composition

| Sl. No. | Chemicals                                         | Composition |
|---------|---------------------------------------------------|-------------|
| 1       | Phosphoric acid (H <sub>3</sub> PO <sub>4</sub> ) | 16 mL/L     |
| 2       | Zinc Oxide (ZnO)                                  | 1.2 g/L     |
| 3       | Sodium Nitrite (NaNO <sub>2</sub> )               | 16 g/L      |
| 4       | Sodium Fluoride (NaF)                             | 2 g/L       |

**Table S2.** Comparison of roughness parameters of bare zinc phosphate coating and zinc phosphate coatings developed from the containing different amounts of BVZ composite

| Coatings           | S <sub>a</sub><br>( $\mu\text{m}$ ) | S <sub>q</sub><br>( $\mu\text{m}$ ) | S <sub>p</sub><br>( $\mu\text{m}$ ) | S <sub>v</sub><br>( $\mu\text{m}$ ) | S <sub>t</sub><br>( $\mu\text{m}$ ) | S <sub>sk</sub><br>( $\mu\text{m}$ ) | S <sub>ku</sub><br>( $\mu\text{m}$ ) |
|--------------------|-------------------------------------|-------------------------------------|-------------------------------------|-------------------------------------|-------------------------------------|--------------------------------------|--------------------------------------|
| Bare ZP            | 2.879                               | 3.558                               | 16.271                              | -9.342                              | 25.613                              | -1.450                               | 3.028                                |
| ZP + 0.05 wt.% BVZ | 2.795                               | 3.440                               | 10.354                              | -10.882                             | 21.236                              | -2.795                               | 2.792                                |
| ZP + 0.1 wt.% BVZ  | 2.527                               | 3.089                               | 9.893                               | -6.981                              | 16.874                              | -4.856                               | 2.982                                |
| ZP + 0.2 wt.% BVZ  | 1.593                               | 1.996                               | 5.878                               | -6.061                              | 11.949                              | -5.896                               | 3.445                                |
| ZP + 0.5 wt.% BVZ  | 2.122                               | 2.640                               | 8.077                               | -8.936                              | 17.014                              | -3.328                               | 3.177                                |

**Table S3.** Comparison of NIR reflectance and NIR solar reflectance of optimized BVZ composite incorporated zinc phosphate coating after exposure in different solutions

| <b>5% Chemicals</b> | <b>NIR reflectance at 1100 nm (R%)</b> | <b>NIR solar reflectance (R*%)</b> |
|---------------------|----------------------------------------|------------------------------------|
| NaCl                | 45.02                                  | 53.90                              |
| NaOH                | 42.18                                  | 51.45                              |
| HCl                 | 39.25                                  | 49.45                              |
| HNO <sub>3</sub>    | 37.69                                  | 47.87                              |

**Table S4.** Comparison of NIR reflectance and NIR solar reflectance of optimized BVZ composite incorporated zinc phosphate coating after exposure to the natural sunlight

| <b>Time duration exposure to sunlight (days)</b> | <b>NIR reflectance at 1100 nm (R%)</b> | <b>NIR solar reflectance (R*%)</b> |
|--------------------------------------------------|----------------------------------------|------------------------------------|
| 0                                                | 51.92                                  | 58.97                              |
| 10                                               | 51.71                                  | 58.77                              |
| 20                                               | 51.60                                  | 58.55                              |
| 30                                               | 51.49                                  | 58.42                              |
| 40                                               | 51.29                                  | 58.27                              |
| 50                                               | 51.22                                  | 58.17                              |
| 60                                               | 51.16                                  | 58.07                              |

**Table S5.** Temperature measurements in front and behind the coating surface

| Sl. No. | coatings                   | Front coating temperature (°C) | Back coating temperature (°C) | Temperature difference (°C) |
|---------|----------------------------|--------------------------------|-------------------------------|-----------------------------|
| 1       | Bare ZP coating            | 62.4                           | 56.1                          | 6.3                         |
| 2       | BVZ zinc phosphate coating | 52.6                           | 40.8                          | 11.8                        |

**Table S6.** Electrochemical impedance parameters: bare zinc phosphate coating and different compositions of BVZ composite-based zinc phosphate coating

| Coatings           | $R_s$<br>( $\Omega \text{ cm}^2$ ) | $Q_c$<br>(F)           | $R_c$<br>( $\Omega \text{ cm}^2$ ) | $Q_{dl}$<br>(F)        | $R_{ct}$<br>( $\Omega \text{ cm}^2$ ) |
|--------------------|------------------------------------|------------------------|------------------------------------|------------------------|---------------------------------------|
| Bare ZP            | 11.60                              | $26.31 \times 10^{-6}$ | 50.53                              | $0.565 \times 10^{-3}$ | 137.7                                 |
| ZP + 0.05 wt.% BVZ | 11.23                              | $9.85 \times 10^{-6}$  | 47.35                              | $1.555 \times 10^{-3}$ | 175.3                                 |
| ZP + 0.1 wt.% BVZ  | 14.02                              | $20.45 \times 10^{-6}$ | 74.7                               | $1.712 \times 10^{-3}$ | 341.6                                 |
| ZP + 0.2 wt.% BVZ  | 22.16                              | $3.09 \times 10^{-6}$  | 188.2                              | $5.814 \times 10^{-6}$ | 765.4                                 |
| ZP + 0.5 wt.% BVZ  | 12.72                              | $6.519 \times 10^{-6}$ | 141.6                              | $1.608 \times 10^{-3}$ | 647.4                                 |

**Table S7** Comparison of corrosion resistance and reflectance data with reported data

| Material                                                | Reflectance | Corrosion resistance                            | Reference     |
|---------------------------------------------------------|-------------|-------------------------------------------------|---------------|
| $\text{LiMg}_{0.8}\text{Co}_{0.2}\text{PO}_4$           | 67%         | $R_{ct} = 9.3 \times 10^9 \Omega\text{cm}^2$    | [1]           |
| $\text{NaZn}_{0.9}\text{Co}_{0.1}\text{PO}_4$           | 64%         | $R_{ct} = 8.8 \times 10^6 \Omega\text{cm}^2$    | [2]           |
| Potassium titanate whiskers                             | 48 %        | Corrosion Rate = $7.531 \times 10^{-4}$<br>mmpy | [3]           |
| Green pigments ( $\text{Co}_x\text{Zn}_{1-x}\text{O}$ ) | 30%         | -                                               | [4]           |
| $\text{Bi}_{1-x}\text{La}_x\text{FeO}_3$                | 44.1%       | -                                               | [5]           |
| SrCaP                                                   | -           | Corrosion Rate = $2.79 \pm 0.03$<br>mmpy        | [6]           |
| BVZ composite                                           | 51.97%      | Corrosion Rate = 1.099 mmpy                     | Present study |

## References

- [1] P.K. Thejus, K.V. Krishnapriya, K.G. Nishanth, NIR reflective, anticorrosive magenta pigment for energy saving sustainable building coatings, *Solar Energy*, 222 (2021) 103-114.
- [2] P.K. Thejus, K.V. Krishnapriya, K.G. Nishanth, A cost-effective intense blue colour inorganic pigment for multifunctional cool roof and anticorrosive coatings, *Solar Energy Materials and Solar Cells*, 219 (2021) 110778.
- [3] W. Wang, Y. Tian, H. Shen, X. Zhang, Modified potassium titanate whiskers for preparation of enhanced corrosion-resistant phosphating conversion coatings with high NIR reflectivity on mild steel, *Journal of Alloys and Compounds*, 955 (2023) 170247.
- [4] J.d.O. Primo, K.W. Borth, D.C. Peron, V.d.C. Teixeira, D. Galante, C. Bittencourt, F.J. Anaissi, Synthesis of green cool pigments ( $\text{Co}_x\text{Zn}_{1-x}\text{O}$ ) for application in NIR radiation reflectance, *Journal of Alloys and Compounds*, 780 (2019) 17-24.
- [5] L. Yuan, A. Han, M. Ye, X. Chen, L. Yao, C. Ding, Synthesis and characterization of environmentally benign inorganic pigments with high NIR reflectance: Lanthanum-doped  $\text{BiFeO}_3$ , *Dyes and Pigments*, 148 (2018) 137-146.
- [6] J.G. Acheson, S. McKillop, J. Ward, A. Roy, Z. Xu, A.R. Boyd, P. Lemoine, P.N. Kumta, J. Sankar, B.J. Meenan, Effects of strontium-substitution in sputter deposited calcium phosphate coatings on the rate of corrosion of magnesium alloys, *Surface and Coatings Technology*, 421 (2021) 127446.
